# Supplementary material
Source: MDPI journal article supplement (https://www.mdpi.com/2312-7481/8/2/14)
Supplement: s1 [file s1]

# Supplementary Materials: Investigation of a Tetrathiafulvalene-Based $\text{Fe}^{2+}$ Thermal Spin Crossover Assembled on Gold Surface

Niccolò Giaconi<sup>1,2</sup>, Andrea Luigi Sorrentino<sup>1,2</sup>, Lorenzo Poggini<sup>3,\*</sup>, Giulia Serrano<sup>1,2</sup>, Giuseppe Cucinotta<sup>1</sup>, Edwige Otero<sup>4</sup>, Danilo Longo<sup>4</sup>, Haiet Douib<sup>5</sup>, Fabrice Pointillart<sup>5</sup>, Andrea Caneschi<sup>2</sup>, Roberta Sessoli<sup>1</sup> and Matteo Mannini<sup>1,\*</sup>

<sup>1</sup> Department of Chemistry “U. Schiff” -DICUS and INSTM Research Unit, University of Florence, Via della Lastruccia 3-13, Sesto Fiorentino, 50019 Florence, Italy; niccolo.giaconi@unifi.it (N.G.); andrealuigi.sorrentino@unifi.it (A.L.S.); giulia.serrano@unifi.it (G.S.); giuseppe.cucinotta@unifi.it (G.C.); roberta.sessoli@unifi.it (R.S.)

<sup>2</sup> Department of Industrial Engineering-DIEF and INSTM Research Unit, University of Florence, Via Santa Marta 3, 50139 Florence, Italy; andrea.caneschi@unifi.it

<sup>3</sup> Institute for Chemistry of OrganoMetallic Compounds (ICCOM-CNR), Via Madonna del Piano, Sesto Fiorentino, 50019 Florence, Italy

<sup>4</sup> Synchrotron SOLEIL, L’Orme des Merisiers, CEDEX 48, 91192 Gif-sur-Yvette, France; edwige.otero@synchrotron-soleil.fr (E.O.); d.longo@nanogune.eu (D.L.)

<sup>5</sup> ISCR (Institut des Sciences Chimiques de Rennes) — UMR 6226, CNRS, University of Rennes, 35042 Rennes, France; haiet.douib@univ-rennes1.fr (H.D.); fabrice.pointillart@univ-rennes1.fr (F.P.)

\* Correspondence: lpoggini@iccom.cnr.it (L.P.); matteo.mannini@unifi.it (M.M.)

## 1. XPS

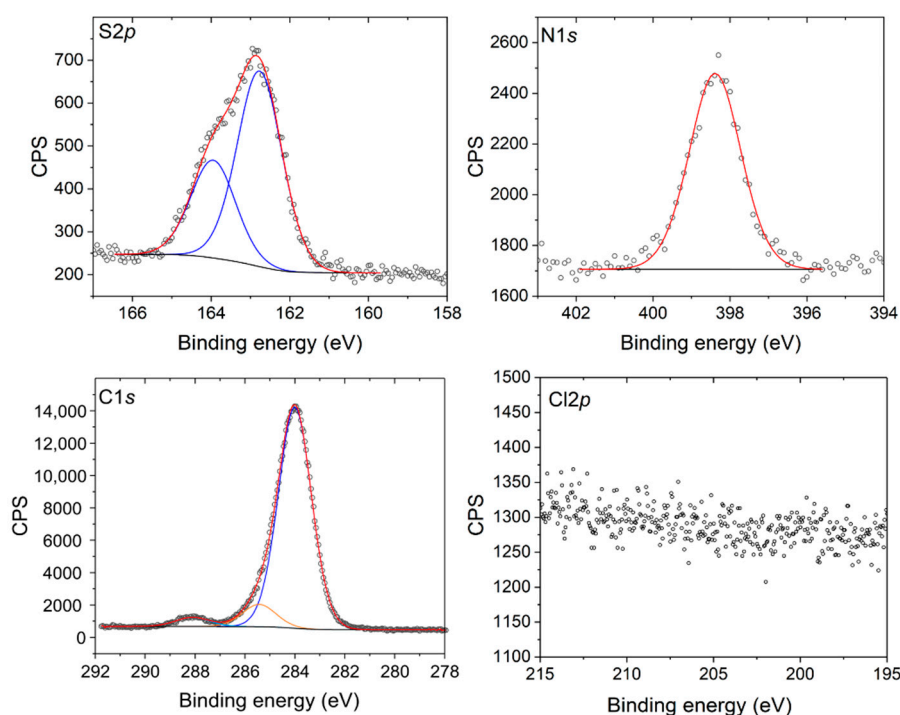

**Figure S1.** S2p, N1s, C1s and Cl2p regions of XPS spectra of [Fe(H<sub>2</sub>Bpz<sub>2</sub>)<sub>2</sub>(L)] thick film on Au.

**Table S1.** Component used for fitting Fe2p XPS spectra of [Fe(H<sub>2</sub>Bpz<sub>2</sub>)<sub>2</sub>(L)] thick film on Au.

| T                | <b>Fe<sub>A+A'</sub></b> | <b>Fe<sub>B+B'</sub></b> | <b>Fe<sub>C+C'</sub></b> | <b>Fe<sub>D+D'</sub></b> | <b>Fe<sub>E+E'</sub></b> |
|------------------|--------------------------|--------------------------|--------------------------|--------------------------|--------------------------|
|                  | B.E. ( $\Delta E_{so}$ ) |
| Room temperature | 710.2 eV<br>(13.1 eV)    | 711.9 eV<br>(13.5 eV)    | 713.7 eV<br>(13.5 eV)    | 715.9 eV<br>(13.2 eV)    | 718 eV<br>(13.1 eV)      |
| 140 K            | 710.1 eV<br>(12.9 eV)    | 712 eV<br>(13.4 eV)      | 713.8 eV<br>(13.5 eV)    | 716 eV<br>(13.1 eV)      | 717.9 eV<br>(13.1 eV)    |

**Table S2.** Semi-quantitative analysis of [Fe(H<sub>2</sub>Bpz<sub>2</sub>)<sub>2</sub>(L)] thick film and of [Fe(H<sub>2</sub>Bpz<sub>2</sub>)<sub>2</sub>(L)]@Au(111).

| Sample                 | S2p [%]    | N1s [%]    | Fe2p [%]   |
|------------------------|------------|------------|------------|
| Expected Stoichiometry | 31.6       | 63.2       | 5.3        |
| Monolayer              | 47.1 ± 2.3 | 39.3 ± 2.0 | 13.6 ± 0.7 |
| Thick film             | 35.5 ± 1.8 | 60.6 ± 3.0 | 4.0 ± 0.2  |

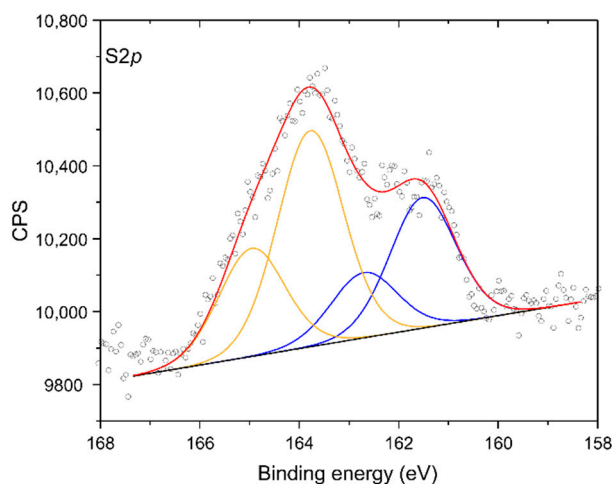**Figure S2.** S2p region of XPS spectra of [Fe(H<sub>2</sub>Bpz<sub>2</sub>)<sub>2</sub>(L)] monolayer on Au. Blue components are attributable to sulfur atoms bound to gold substrate.

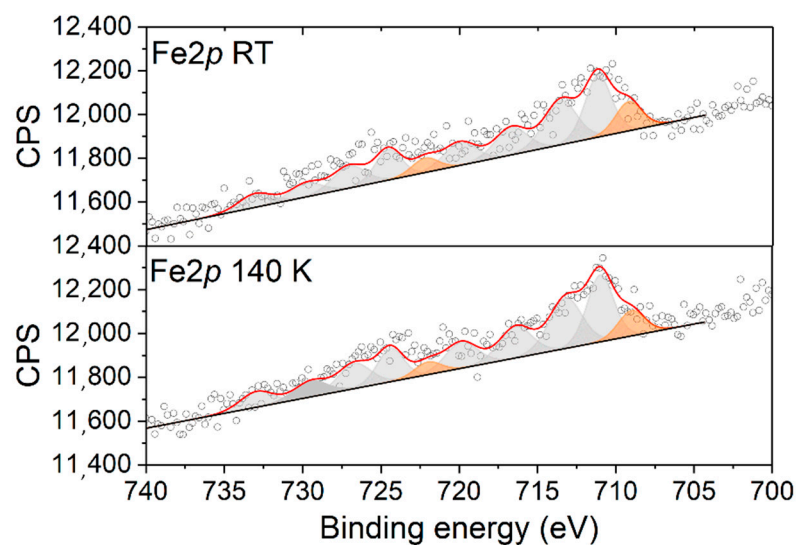

**Figure S3.** Fe2p region of XPS spectra of  $[\text{Fe}(\text{H}_2\text{Bpz})_2(\text{L})]@\text{Au}(111)$  at room temperature and at 140 K.

## 2. XAS

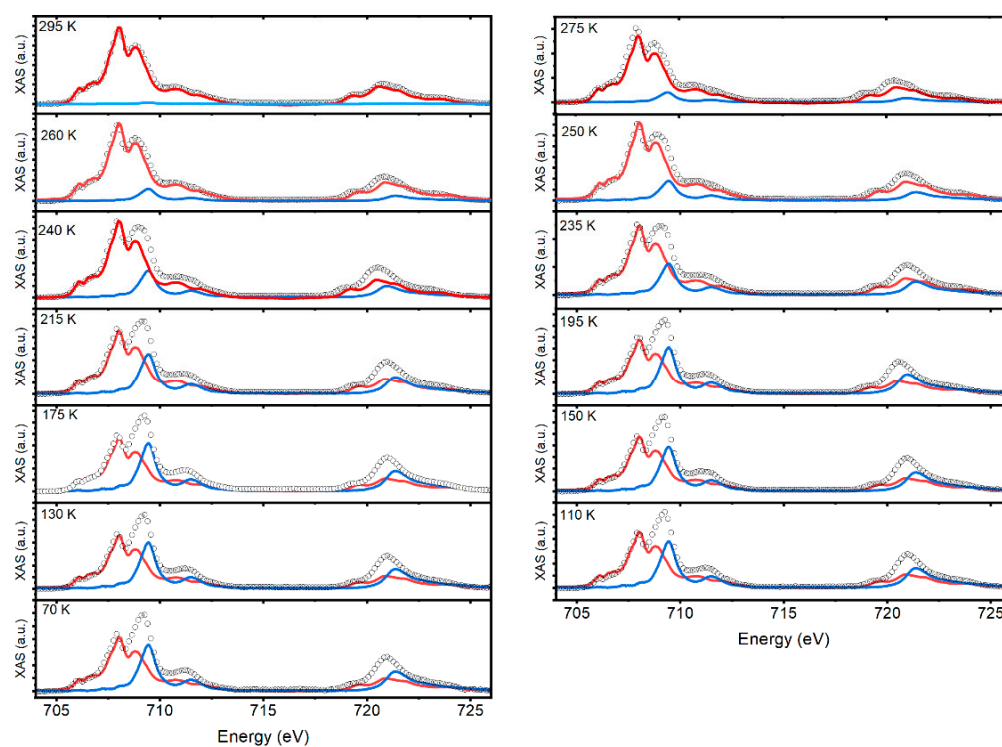

**Figure S4.** XAS spectra at the Fe  $L_{2,3}$  edge of  $[\text{Fe}(\text{H}_2\text{Bpz})_2(\text{L})]$  thick film between 295 K and 70 K. Experimental spectra (dots), HS contribution (red line) and LS contribution (blue line).

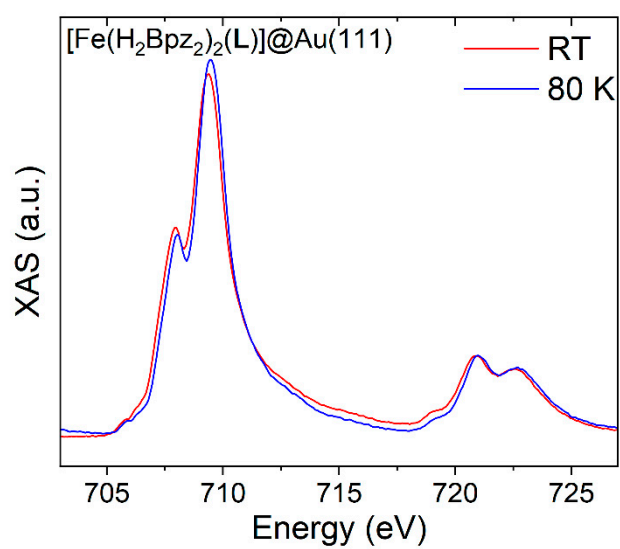

**Figure S5.** XAS spectra at the Fe L<sub>2,3</sub> edge of [Fe(H<sub>2</sub>Bpz<sub>2</sub>)<sub>2</sub>(L)]@Au(111) at 80 K and 295 K.
